# Supplementary material for: Elucidating zinc-ion battery mechanisms in freestanding carbon electrode architectures decorated with nanocrystalline ZnMn2O4
Source: Royal Society of Chemistry journal article supplement (doi:10.1039/d1ma00159k), 2021-01-01
Supplement: d1ma00159k1.pdf [file d1ma00159k1.pdf]

## Supporting Information

### Elucidating zinc-ion battery mechanisms in freestanding carbon electrode architectures decorated with nanocrystalline ZnMn<sub>2</sub>O<sub>4</sub>

Megan B. Sassin,<sup>a,\*</sup> Maya E. Helms,<sup>a</sup> Joseph F. Parker,<sup>a</sup> Christopher N. Chervin,<sup>a</sup> Jesse S. Ko,<sup>b</sup> Debra R. Rolison,<sup>a</sup> and Jeffrey W. Long<sup>a,\*</sup>

<sup>a</sup>Code 6170, Surface Chemistry Branch, U.S. Naval Research Laboratory,  
Washington, DC USA 20375

<sup>b</sup>Former NRC Postdoctoral Associate at the U.S. Naval Research Laboratory.  
Present address: Applied Physics Laboratory, Baltimore, MD USA

**Table S1.** Elemental Analysis of ZnMn<sub>2</sub>O<sub>4</sub>@CNF.

| Element   | Method <sup>a</sup> | Result  |
|-----------|---------------------|---------|
| Carbon    | GLI Procedure ME-14 | 36.41%  |
| Manganese | GLI Procedure ME-70 | 26.5%   |
| Sodium    | GLI Procedure ME-70 | 0.0479% |
| Zinc      | GLI Procedure ME-70 | 11.2%   |

<sup>a</sup> analysed using Galbraith Laboratories protocols

Calculation of wt. % ZnMn<sub>2</sub>O<sub>4</sub> in CNF from elemental analysis:

$$\frac{0.112g\ Zn}{1g\ sample} * \frac{1mol\ Zn}{65.38g} * \frac{2mol\ Mn}{1mol\ Zn} * \frac{54.94g}{1mol\ Mn} + \frac{0.188g\ Mn}{1g\ sample} = 18.8\% \text{ Mn}$$

$$\frac{0.112g\ Zn}{1g\ sample} * \frac{1mol\ Zn}{65.38g} * \frac{4mol\ O}{1mol\ Zn} * \frac{16g}{1mol\ O} + \frac{0.110g\ O}{1g\ sample} = 11\% \text{ O}$$

$$\rightarrow 18.8\% \text{ Mn} + 11.2\% \text{ Zn} + 11\% \text{ O} = 41 \text{ wt.}\% \text{ ZnMn}_2\text{O}_4\text{@CNF}^*$$

*\*Based on the assumption that all zinc in the sample exists in the form of ZnMn<sub>2</sub>O<sub>4</sub>, as no other crystalline phase is observed via X-ray diffraction*

**Eqn S1:** %Mn unassociated with ZnMn<sub>2</sub>O<sub>4</sub>

$$= 26.5\% \text{ Mn measured} - 18.8\% \text{ Mn associated with ZnMn}_2\text{O}_4 = 7.7\%$$

**Eqn S2:** % of Zn in pores for reaction

Moles Zn<sup>2+</sup> required for reaction:

$$\frac{224 \text{ mA h}}{g_{Total}} * \frac{0.01 \text{ g}_{Total}}{\text{electrode}} * \frac{1 \text{ A}}{1000 \text{ mA}} * \frac{3600 \text{ s}}{1 \text{ h}} * \frac{1 \text{ mol } e^{-}}{96485 \text{ C}} * \frac{0.5 \text{ mol Zn}^{2+}}{1 \text{ mol } e^{-}} = 4.2 \times 10^{-5}$$

Moles Zn<sup>2+</sup> inside pores:

$$\frac{0.44 \text{ cm}^3}{g_{Total}} * \frac{0.01 \text{ g}_{Total}}{\text{electrode}} = 0.0044 \text{ cm}^3 = 4.4 \times 10^{-6} \text{ L} * \frac{1 \text{ mol ZnSO}_4}{L} = 4.4 \times 10^{-6}$$

% of required Zn<sup>2+</sup> inside pores

$$\frac{4.4 \times 10^{-6} \text{ mol Zn}^{2+} \text{ inside pores}}{4.2 \times 10^{-5} \text{ mol Zn}^{2+} \text{ required}} * 100 = 10.5 \%$$

**Eqn. S3: Concentration of dissolved Mn<sup>2+</sup> inside pores**

41 wt. % ZnMn<sub>2</sub>O<sub>4</sub> in the electrode

Electrode mass: 0.01 g

Pore volume: 0.0044 cm<sup>3</sup> = 4.4 × 10<sup>-6</sup> L

% of electrode area internally

Geometric area of electrode: 0.000127 m<sup>2</sup>

Specific surface area of electrode: 260 m<sup>2</sup> g<sup>-1</sup> \* 0.01 g = 2.6 m<sup>2</sup>

$$\frac{2.6 \text{ m}^2 - 0.000127 \text{ m}^2}{2.6 \text{ m}^2} * 100 = 99 \%$$

*Since 99% of the surface area is expressed internally, essentially all of the ZnMn<sub>2</sub>O<sub>4</sub> mass exists in the interior of the electrode, so if all of the ZnMn<sub>2</sub>O<sub>4</sub> dissolved, the [Mn<sup>2+</sup>] dissolved inside pores would be:*

$$\frac{0.41 \text{ g ZnMn}_2\text{O}_4}{1 \text{ g}_{Total}} * \frac{0.01 \text{ g}_{Total}}{\text{electrode}} * \frac{1 \text{ mol ZnMn}_2\text{O}_4}{239.25 \text{ g}} * \frac{2 \text{ mol Mn}}{1 \text{ mol ZnMn}_2\text{O}_4} * \frac{\text{pore vol}}{4.4 \times 10^{-6} \text{ L}} = 7 \text{ M Mn}$$

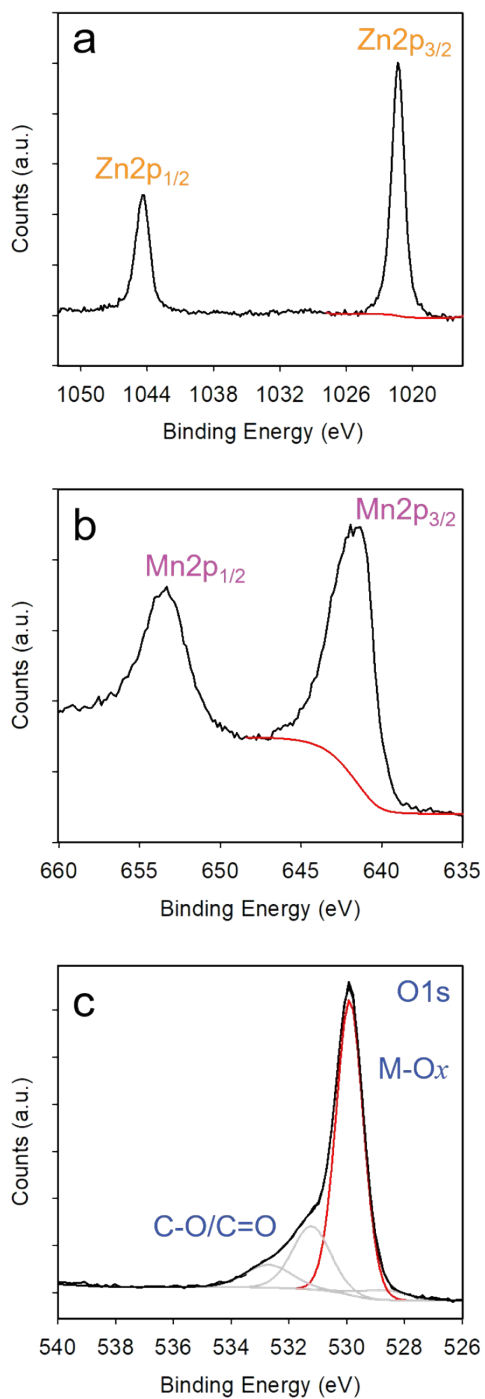

**Fig. S1** X-ray photoelectron spectra of (a) Zn 2p, (b) Mn 2p, and (c) O 1s of uncycled ZnMn<sub>2</sub>O<sub>4</sub>@CNF paper.

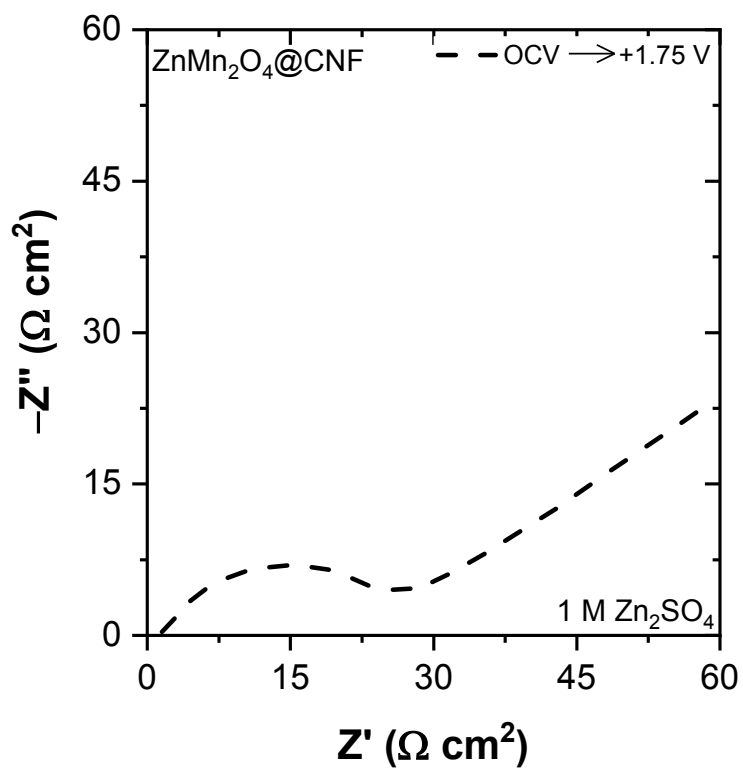

**Fig. S2** Nyquist plot of  $\text{ZnMn}_2\text{O}_4@\text{CNF}$  after conditioning at 1.75 V for 30 min after a voltage step from open-circuit voltage in 1 M  $\text{ZnSO}_4$ .

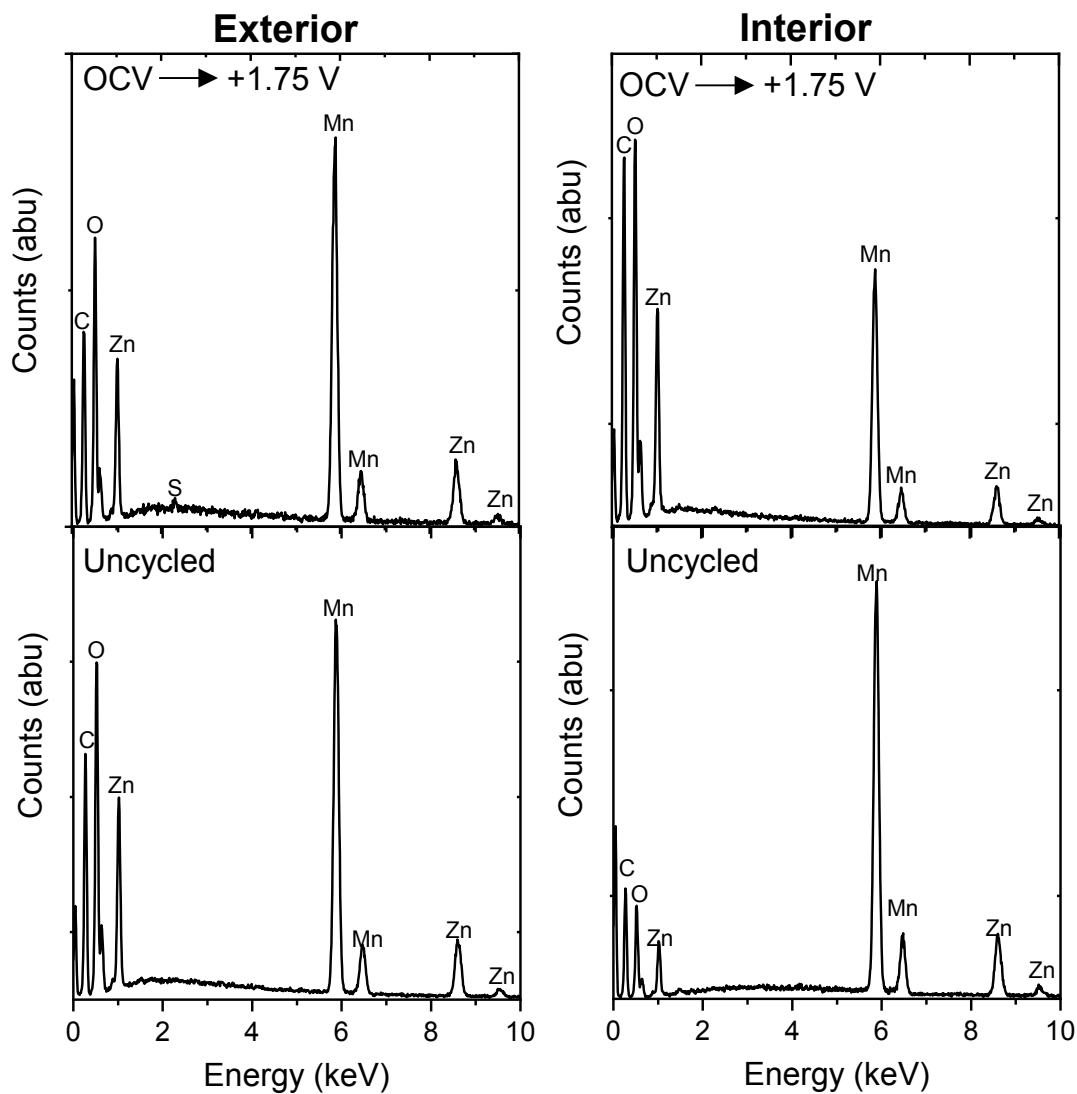

**Fig. S3** Energy-dispersive X-ray spectra for the (left) exterior and (right) interior surfaces of (bottom row) uncycled  $\text{ZnMn}_2\text{O}_4@\text{CNF}$  and (top row) after conditioning at 1.75 V for 30 min after scanning directly from OCV).

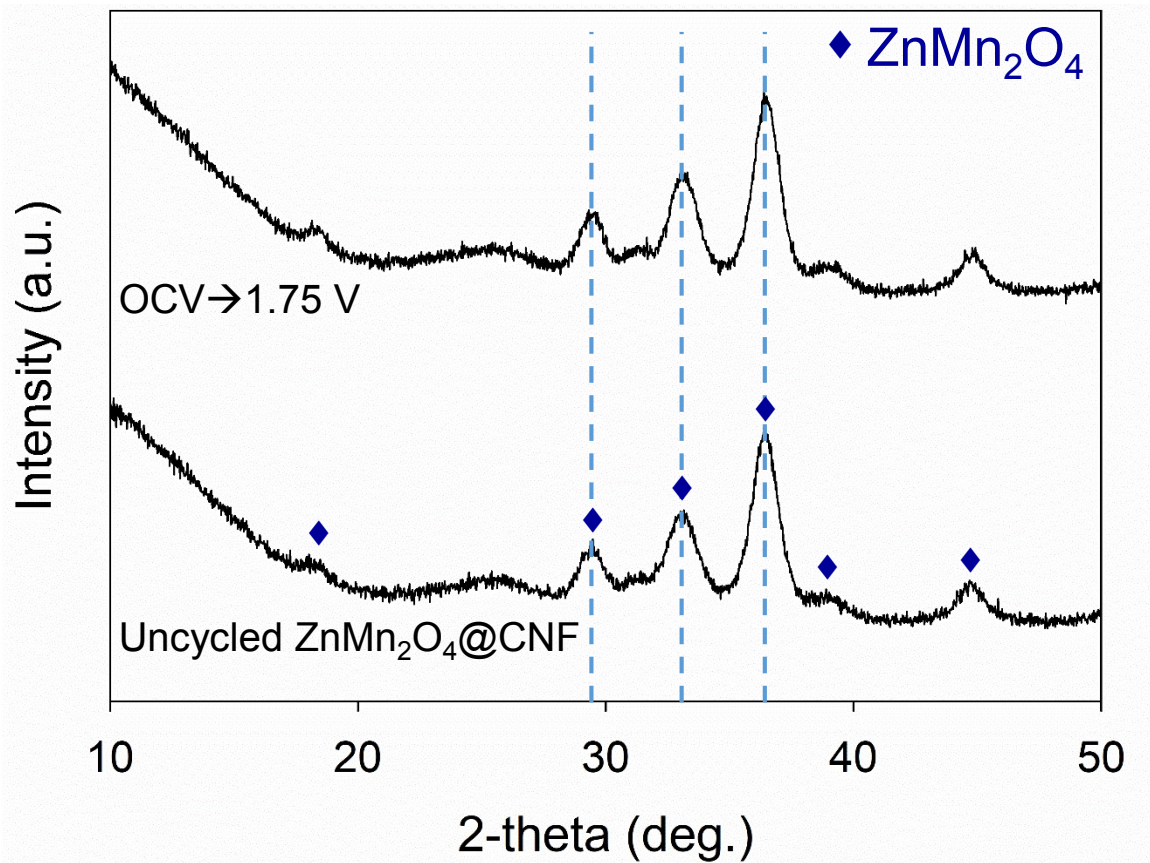

**Fig. S4** X-ray diffraction patterns of uncycled ZnMn<sub>2</sub>O<sub>4</sub>@CNF and after conditioning at 1.75 V for 30 min directly from OCV.

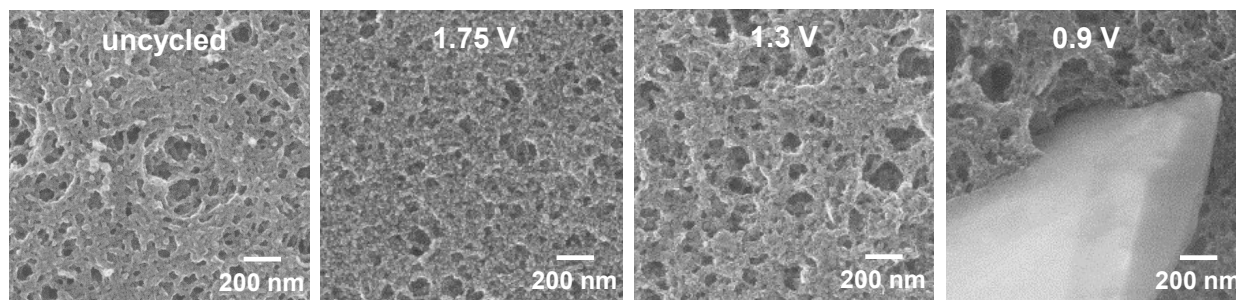

**Fig. S5** Scanning electron micrographs of the exterior surface of ZnMn<sub>2</sub>O<sub>4</sub>@CNFs after conditioning at specified voltages for 30 min in 1 M ZnSO<sub>4</sub>.

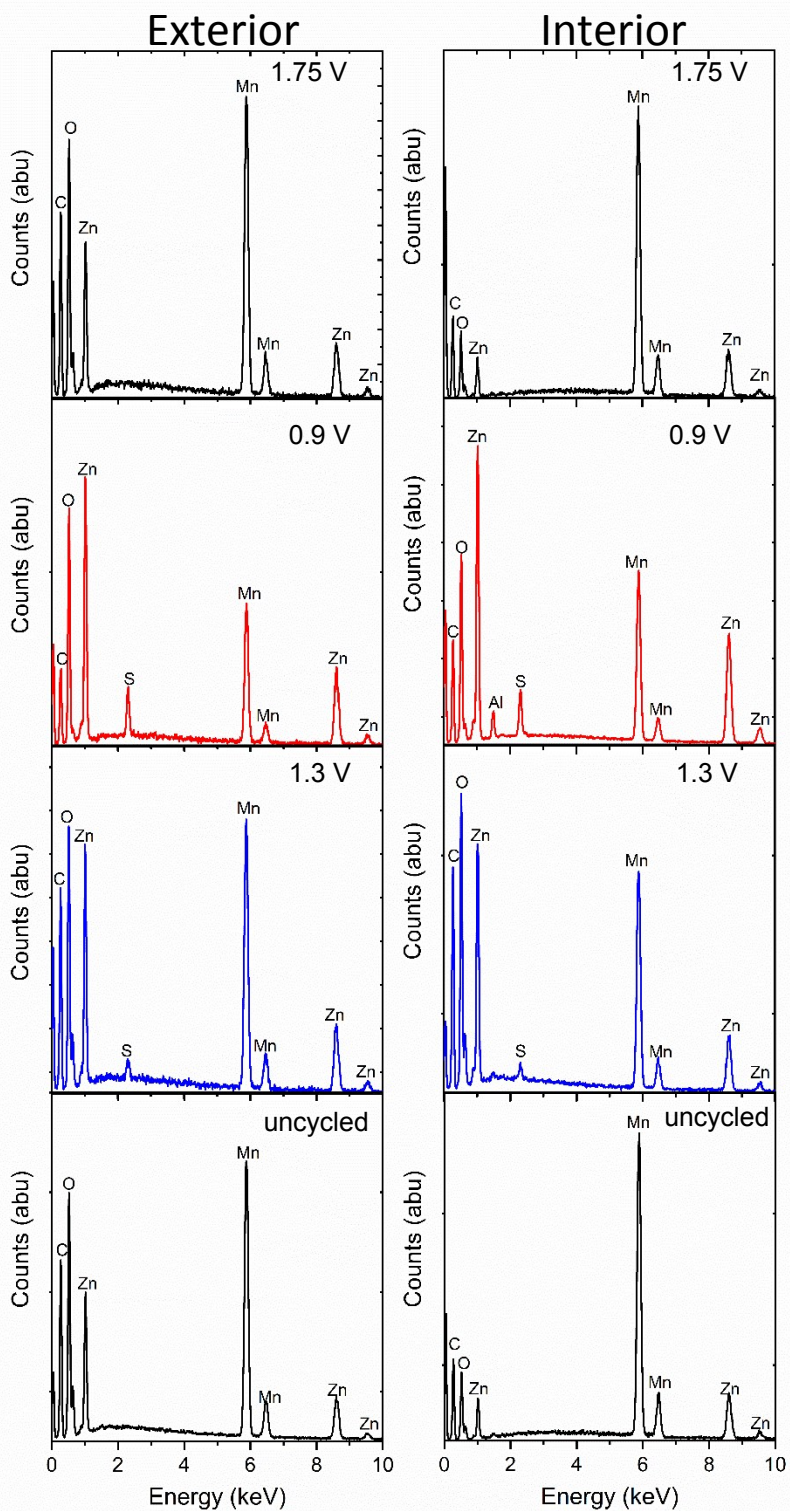

**Fig. S6** Energy-dispersive X-ray spectra of the exterior (left) and interior (right) surfaces of ZnMn<sub>2</sub>O<sub>4</sub>@CNF as a function of applied voltage in 1 M ZnSO<sub>4</sub>.

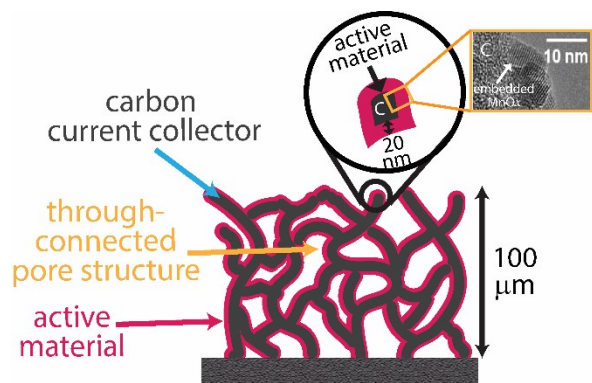

Fig. S7 Schematic of the 3D multifunctional electrode architecture.

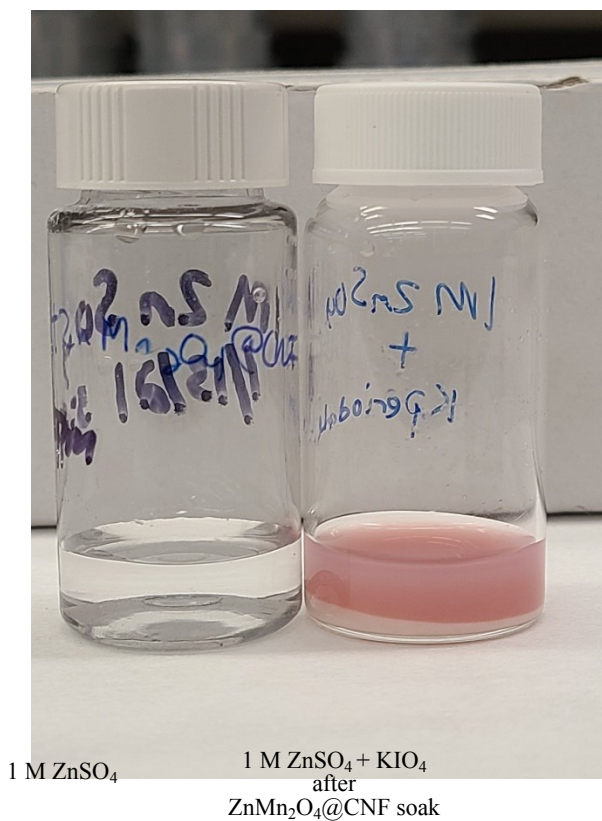

Fig. S8 Optical image of 1 M  $\text{ZnSO}_4$  after soaking  $\text{ZnMn}_2\text{O}_4@\text{CNF}$  for 13 days (left) and after adding excess potassium periodate (right). The magenta hue arises from the presence of  $\text{Mn}^{7+}$  generated from the oxidation of soluble  $\text{Mn}^{2+}$  by  $\text{KIO}_4$ .
